1  
2  
3  
4  
5  
6  
7  
8  
9  
10  
11  
12  
13  
14  
15  
16  
17  
18  
19  
20  
21  
22  
23  
24  
25  
26  
27  
28  
29  
30  
31  
32  
33

**The draft genome of the invasive walking stick, *Medauroidea extradentata*, reveals extensive lineage-specific gene family expansions of cell wall degrading enzymes in Phasmatodea.**

**Authors:**

Philipp Brand<sup>1</sup>, Wei Lin<sup>2</sup>, Brian R. Johnson<sup>2</sup>

**Affiliations:**

<sup>1</sup>Department of Evolution and Ecology, Center for Population Biology, University of California, Davis, Davis, California 95619

<sup>2</sup>Department of Entomology and Nematology, University of California, Davis, Davis, CA 95616

**Data Availability**

The *Medauroidea extradentata* genome assembly, Med v1.0, is available for download via NCBI (Bioproject: PRJNA369247). The genome, annotation files, and official gene set Mext\_OGS\_v1.0 are also available at the i5k NAL workspace (<https://i5k.nal.usda.gov/medauroidea-extradentata>) and at github ([https://github.com/pbrec/medauroidea\\_genome\\_resources](https://github.com/pbrec/medauroidea_genome_resources)). The genomic raw reads are available via NCBI SRA: SRR6383867 and the raw transcriptomic reads are available at NCBI SRA: SRR6383868, SRR6383869.

34 **Running title:**

35

36 Draft genome of the walking stick, *Medauroidea extradentata*

37

38

39 **Key words:**

40

41 Whole genome assembly, Phasmidae, walking sticks, cellulase evolution, pectinase evolution,  
42 horizontal gene transfer

43

44

45 **Corresponding author:**

46

47 Brian R. Johnson

48 Department of Entomology and Nematology

49 University of California, Davis

50 One shields Ave

51 Davis, CA 95616

52 Office: (530) 754-8789

53 brnjohnson@ucdavis.edu

54

55

56 **Abstract**

57 Plant cell wall components are the most abundant macromolecules on Earth. The study of the  
58 breakdown of these molecules is thus a central question in biology. Surprisingly, plant cell wall  
59 breakdown by herbivores is relatively poorly understood, as nearly all early work focused on the  
60 mechanisms used by symbiotic microbes to breakdown plant cell walls in insects such as  
61 termites. Recently, however, it has been shown that many organisms make endogenous  
62 cellulases. Insects, and other arthropods, in particular have been shown to express a variety of  
63 plant cell wall degrading enzymes in many gene families with the ability to break down all the  
64 major components of the plant cell wall. Here we report the genome of a walking stick,  
65 *Medauroidea extradentata*, an obligate herbivore that makes uses of endogenously produced  
66 plant cell wall degrading enzymes. We present a draft of the 3.3Gbp genome along with an  
67 official gene set that contains a diversity of plant cell wall degrading enzymes. We show that at  
68 least one of the major families of plant cell wall degrading enzymes, the pectinases, have  
69 undergone a striking lineage-specific gene family expansion in the Phasmatodea. This genome  
70 will be a useful resource for comparative evolutionary studies with herbivores in many other  
71 clades and will help elucidate the mechanisms by which metazoans breakdown plant cell wall  
72 components.

## 73 **Introduction**

74  
75 The components of the plant cell wall are the most abundant macromolecules on earth and the  
76 study of their breakdown by herbivores and decomposers is thus of central importance to biology  
77 (Beguin and Aubert 1994; Keegstra 2010). Plant cell walls (PCWs) contain lignocellulosic  
78 compounds that are difficult to degrade, such as xylan, cellulose, hemicellulose, pectin, and  
79 lignin (Cosgrove 2005). Degradation of PCWs requires the ability to physically degrade the  
80 tough material, then biochemically breakdown some or all of its components (Calderon-Cortes et  
81 al 2012). Organisms across the tree of life employ a diverse set of strategies to accomplish this  
82 with some able to utilize all PCW components and others only a subset. Central to all approaches  
83 are plant cell wall degrading enzymes (PCWDEs) falling into several gene families (Beguin and  
84 Aubert 1994; Lo et al 2003; Watanabe and Tokuda 2010). In addition to being of interest to those  
85 studying ecology and physiology, PCWDE's are also of interest to those in the biofuel industry,  
86 as the efficient breakdown of cellulose to simple sugars is central to the utility of biofuels (Pauly  
87 and Keegstra 2010).

88         Invertebrates, chiefly insects, are major herbivores and decomposers in many ecosystems  
89 and effectively use lignocellulosic materials for energy. Early work on termites, the major group  
90 of strictly wood feeding insects, suggested that PCWDEs produced by bacterial symbionts are  
91 required for insect breakdown of PCWs (Martin 1991; Breznak and Brune, 1994). This was  
92 supported both by studies of microbes in termites, but also by work on model systems, flies and  
93 butterflies, that showed a lack of symbionts and a lack of PCW breakdown ability (Slaytor 1992;  
94 reviewed in Watanabe and Tokuda 2010). Recent work, however, has shown that endogenously  
95 produced PCWDEs are more widespread and important in insects than previously thought  
96 (Watanabe et al 1998; Lo et al 2003; Nakashima et al 2002; Shelomi et al 2014a,b; Bai et al

97 2016; Wu et al 2016). First, a closer examination of termites showed that they also produce  
98 endogenous PCWDEs, and second, studies of other insects showed widespread production of  
99 endogenously produced PCWDEs. A current obstacle to understanding the diversity of  
100 PCWDE's in insects is sampling bias in the sequencing of genomes, towards holometabolous  
101 insects. It is likely many holometabolous insects lack the diversity of PCWDE's present in some  
102 clades of hemimetabolous insects (reviewed in Watanabe and Tokuda 2010). This prediction is  
103 based on the discovery that so far only Coleoptera and Hymenoptera in the Holometabola have  
104 been found to have PCWDEs (and only Coleoptera in large numbers), while most  
105 hemimetabolous insects sequenced thus far have them, including several clades with extensive  
106 repertoires (reviewed in Watanabe and Tokuda 2010).

107         Phasmids, walking sticks, are large long-lived insects that feed exclusively on leaves.  
108 Previous work using transcriptomics has shown that phasmids express a diversity of PCWDEs,  
109 including cellulases, hemicellulases, and pectinases (Shelomi et al 2014a,b, 2016; Wu et al  
110 2016). This work also suggested that gene duplications in the cellulases have led to enzymes  
111 with the capacity to break down multiple components of the PCW (Kirsh et al 2014; Shelomi et  
112 al 2016). Of further interest, pectinases found in more derived phasmid transcriptomes is more  
113 similar to bacterial pectinases than to those known from eukaryotes, suggesting horizontal gene  
114 transfer (Shelomi et al 2016b). Such work highlights the utility of phasmids as models for the  
115 study of PCW breakdown evolution.

116         Here we present a draft genome for *Medauroidea extradentata*, a common invasive  
117 walking stick found in many parts of the world. The ease of culturing these insects in the lab, and  
118 their widespread distribution, makes them a suitable potential model system for laboratory  
119 studies of PCWDEs. We used the DISCOVAR approach coupled with RNA-Seq based

120 scaffolding to produce the draft genome. Annotation of the genome, assisted by several RNA-  
121 Seq datasets, produced a high-quality gene set comparable to those of other sequenced  
122 invertebrates with large genome size. Analyses of the pectinase gene family, in comparison to  
123 those pectinases in other hemimetabolous insects, supports a single horizontal gene transfer  
124 event of pectinase genes from bacteria to Phasmatodea. In addition, we identify more extensive  
125 than previously thought lineage-specific expansions of this gene family following the horizontal  
126 transfer event.

127

## 128 **Materials and Methods**

### 129 Genome sequencing and assembly

130 DNA was extracted from a single female wild caught *Medauroidea extradentata* adult, captured  
131 near Sacramento CA, with a Qiagen DNeasy kit using manufacturer's instructions. The digestive  
132 tract was first removed from the insect to minimize contamination from food items and  
133 microbes. DNA was tested for purity with the nanodrop 1000 and for concentration with the  
134 Qubit 3.0. A single sequencing library was then made with the Truseq DNA PCR Free library  
135 preparation kit according to the manufacturer's instructions. The library was quality tested with  
136 the Bioanalyzer 2000 and 250 base pair paired end sequencing was conducted on the Illumina  
137 Hiseq 2500. A total of 355,738,482 reads were produced. Assembly of the resulting reads was  
138 performed with DISCOVAR (version 1) using default parameters (Weisenfeld et al 2014).  
139 Because the sample was wild caught, it can be expected to be more heterozygous than is typical  
140 for genome studies which often use inbred lab strains. Accordingly, to reduce assembly errors  
141 due to high heterozygosity, Redundans (version 1), with default parameters (contigs with greater  
142 than 85% similarity to other longer contigs removed), was used to reduce the number of

143 duplicate contigs from the initial DISCOVAR assembly (Pryszcz and Gabaldon 2016). Because  
144 the resulting assembly was still fragmented, a final scaffolding step was performed with Agouti  
145 (version 1), an RNA-Seq based scaffolder, using default parameters (Zhang et al 2016). This  
146 assembly was labeled “Med v1.0” and was used for all subsequent analyses. Earlier assemblies  
147 can be produced from the raw reads, available at NCBI, or are available upon request. The  
148 quality of the assembly was assessed using busco v2 (Simao et al 2015). Busco was run using the  
149 arthropoda\_odb9 database in genome mode.

150

#### 151 Genome size estimation

152 Genome size was estimated from the sequencing reads based on the k-mer frequency spectrum.  
153 A k-mer library based on all sequence reads was prepared using Jellyfish with a k value of 25.  
154 The resulting k-mer frequency spectrum was then used to estimate genome size on the basis of  
155 the consecutive length of all reads divided by the sequencing depth as previously described  
156 (Brand et al. 2017).

157

#### 158 Genome annotation

159 Several libraries were constructed and sequenced to facilitate genome annotation. In short, RNA  
160 was extracted from freshly dissected tissue with Trizol and quality controlled with the  
161 Bioanalyzer 2100 to ensure no degradation. Quantification of RNA was done with the Qubit 3.0.  
162 All libraries were 150 bp PE and were constructed with the NEBNext<sup>®</sup> Ultra<sup>™</sup> RNA Library  
163 Prep Kit for Illumina using the manufacturer’s instructions. All samples were from female  
164 insects. RNA was extracted from: whole bodies of juvenile insects (5 pooled insects), the  
165 reproductive tract of adults (5 pooled insects), and 3 pools of 5 insects for the Malpighian tubules

166 of adult insects. In addition, a previous study provided 3 libraries of the anterior midgut and 3  
167 libraries of the posterior midgut (Shelomi et al 2014a). Separate libraries were produced for  
168 juveniles and adults, but the resulting reads were pooled for transcriptome assembly using  
169 Bridger (r2014-12-01) with default parameter settings (Chang et al 2015). In total ~170 million  
170 150 PE reads were produced for juvenile whole body libraries, ~50.5 million 150 PE for adult  
171 reproductive tracts, and ~152 million 150 PE reads total for the Malpighian tubules.

172 Maker was used for annotation with commonly used recommended settings (Cantarel et  
173 al 2008). In short, Augustus was used for *ab initio* gene prediction (Stanke et al 2004) using the  
174 training from aphid (nearest insect from available options), blastx was used for protein homology  
175 searches, and tblastn was used to align cDNAs from the transcriptome to the genome. Repeat  
176 masker was used to mask repetitive DNA during annotation. We provide a high-confidence  
177 subset of all gene annotations based on gene expression quantification and homology to the stick  
178 insect *Timema cristinae*. We identified reciprocal best blast hits (BBH) between our gene models  
179 and *T. cristinae* (Soria-Carrasco et al. 2014) using blastp with an evalue-cutoff of 10E-12. In  
180 addition, we used Kallisto (Bray et al. 2016) to infer expression levels of all gene models based  
181 on our RNA-Seq libraries. All genes with a BBH to *T. cristinae* and/or a TPM (transcripts per  
182 million) estimate  $\geq 1$  were included in the high-confidence gene set, representing the *M.*  
183 *extradentata* official gene set (Mext\_OGS\_v1.0).

184

185 Repetitive element annotation

186 Tandem repeats

187 Micro- and mini-satellites (1-6 bp and 7-1000 bp motif length, respectively) were annotated in  
188 all scaffolds  $\geq 1000$ bp using Phobos 3.3.12 (Mayer 2010). Therefore, one independent run for



189 each class of tandem repeats was performed with Phobos parameter settings following (Leese et  
190 al. 2012: gap score and mismatch score set to -4 and a minimum repeat score of 12).

191

192 TEs

193 In order to annotate TEs, RepeatModeler was used for de novo repeat element annotation and  
194 classification followed by RepeatMasker to detect the total fraction of repetitive elements present  
195 in the genome assembly (Smit et al. 2016). RepeatModeler v1.0.8 was run with default settings  
196 using the NCBI blast algorithm (Altschul et al. 1990) for repeat detection. The resulting de novo  
197 TE annotations were used as a database for Repeatmasker v4.0.5 with Crossmatch in the  
198 sensitive mode. Low complexity regions were excluded from the analysis.

199

200 Plant cell wall degrading enzyme annotation and phylogenetic analysis

201 A combination of tblastn and exonerate (Altschul et al. 1990; Slater and Birney 2005) was used  
202 to manually annotate genes of the pectinase [polygalacturonase] and cellulase [endo-beta-1,4-  
203 glucanase] gene families. We used the semi-automated pipeline described in Brand and Ramirez  
204 (2017). Briefly, genes known from bacteria and eukaryotes including fungi, plants, and insects  
205 were used as query to identify scaffolds with significant tblastn hits (e-value <10E-6).

206 Subsequently, we used exonerate to identify potential intron-exon boundaries of genes on the  
207 respective scaffolds. Resulting gene models with a minimum length of 150 amino acids were

208 included in the gene families. In addition to *M. extradentata*, we annotated three phasmids

209 *Dryococelus australis* (Mikheyev et al. 2017), *Clitarchus hookery* (Wu et al. 2017) and *Timema*

210 *cristinae* (Riesch et al. 2017), as well as the German cockroach *Blatella germanica* (Harrison et

211 al. 2018) and the termite *Zootermopsis nevadensis* (Terrapon et al. 2014).

212 To identify the putative evolutionary origin of the annotated pectinase gene sequences,  
213 we used available annotations to check for eukaryote gene models in the 20kb flanking regions  
214 of each gene upstream and downstream in the respective genomes. If no gene models containing  
215 multiple exons were located within the flanking regions, we used blastn against the NCBI  
216 nuccore database to identify the origin of the gene. Using an evaluate threshold of 10E-6, genes  
217 were either identified as of insect, bacterial, or unknown origin.

218 In order to understand the evolutionary history of the two PCWDE gene families, we next  
219 inferred the gene family phylogenies. Therefore, the protein sequences of the identified genes of  
220 all six hemimetabolous insects and genes from outgroups covering main bacterial and all major  
221 eukaryote lineages (GIs from Shelomi et al. 2014a) were used to produce an alignment using  
222 mafft (Kato et al. 2002) applying the L-INS-I algorithm with the --maxiterate option set to  
223 1,000. The alignments were manually examined for conserved functional sites (Shelomi et al.  
224 2014a) and used for maximum likelihood gene tree inference with RaXML (Stamatakis et al.  
225 2005) using the JTT + gamma substitution model.

226

#### 227 Data availability

228 The *Medauroidea extradentata* genome assembly, Med v1.0, is available for download via NCBI  
229 (Bioproject: PRJNA369247). The genome, annotation files, and official gene set  
230 Mext\_OGS\_v1.0 are also available at the i5k NAL workspace  
231 (<https://i5k.nal.usda.gov/medauroidea-extradentata>) and at github  
232 ([https://github.com/pbrec/medauroidea\\_genome\\_resources](https://github.com/pbrec/medauroidea_genome_resources)). The genomic raw reads are  
233 available via NCBI SRA: SRR6383867 and the raw transcriptomic reads are available at NCBI  
234 SRA: SRR6383868, SRR6383869.

235

## 236 **Results and Discussion**

237 Basic assembly and annotation

238 Genome size was estimated to be 3.3Gbp based on the kmer analysis (Table 1). The

239 *Medauroidea extradentata* genome assembly has 135,692 scaffolds with an N50 score of 43,047

240 (Table 1). The final genome assembly (post redundans and post agouti) is 2.6Gbp which is

241 78.8% percent of the estimated size based on kmer counts. Coverage was found to be

242 approximately 54-fold based on the total amount of DNA produced and the estimated genome

243 size. Genomic GC content was 37%.

244 The Busco analysis showed a level of completeness comparable to that for other large

245 arthropod genomes (Table 2). 78.8% of genes in the Arthropod DB were complete, 17.4% were

246 present but fragmented and only 3.8% were missing. For comparative purposes, two large

247 arthropod genomes recently published (Parhyale, a crustacean, and Locust) have values of 78.5%

248 and 41.4% for completeness, 10.4% and 31.5% for fragmented, and 11.1% and 27.1% for

249 missing (Wang et al 2014; Kao et al 2016). Essentially, these 3 large genomes are 10 times the

250 size of most holometabolous insect genomes (which are about 300MB) and have very high levels

251 of repetitive DNA (Kidwell 2002). It is thus not surprising that they are less complete at the first

252 draft stage, though future work should be conducted to improve these assemblies.

253 Our annotation efforts resulted in a total of 103,773 preliminary gene models of which

254 35,742 were homologous to *T. cristinae* and/or expressed based on RNA-Sequencing and thus

255 constitute the official gene set (OGS version 1.0).

256

257 Repetitive elements

## 258 Tandem Repeats

259 A total of 673,636 microsatellite loci with a consecutive length of 23,936,685 bp were detected.  
260 Minisatellites with motif lengths from 7 bp to 1000 bp were less numerous in the genome with  
261 257,457 loci but had a higher accumulative length (44,403,552 bp). Accordingly, tandem repeats  
262 represent 2.6% of the assembly, suggesting that they contribute a small proportion to the overall  
263 genome size.

264

## 265 TEs

266 The RepeatModeler analysis revealed a total of 1409 repeat element families in the assembly of  
267 which 312 (22.1%) belonged to known TE families including 171 DNA transposons and 141  
268 retroelements. The remaining 1097 (77.9%) repeat element families could not be classified into  
269 known TE families. All 1409 detected repeat element families were used as database for the  
270 RepeatMasker analysis. This way, a total of 4,225,547 elements were annotated in the assembly  
271 of which 901,853 (21.3%) were derived from the 312 classified TE families. The remaining  
272 3,323,694 (78.7%) elements belonged to the unclassified repeat element families. In total, all  
273 annotated repeat elements had a cumulative length of 1,274,150,341 bp corresponding to 49.29%  
274 of the total genome assembly length. The majority of repeat elements were derived from  
275 unclassified families corresponding to 37.51% of the total assembly length.

276         Given the large genome size, the detected high fraction of the genome associated with  
277 repetitive element families is not surprising. Large genome sizes in insects and most other  
278 organisms are generally associated with elevated TE activity and content (Kidwell 2002).  
279 Although this correlation is ubiquitous in nature, most repetitive elements associated with this  
280 form of ‘genome obesity’ are not very well characterized, due to the fast evolving nature of TEs,

281 which leads to large underestimates of genomic TE content in non-model lineages (Chalopin et  
282 al. 2015; Platt et al. 2016). This likely explains the large fraction of unclassified repetitive  
283 element families detected in the present genome assembly. In total, our analysis suggests that a  
284 large proportion of the *M. extradentata* genome is repetitive. This result is similar to other  
285 insects with comparable genome sizes (Wang et al. 2014, Brand et al. 2017).

286

287 Plant cell wall degrading enzymes and the evolution of pectinases and cellulases

288 *M. extradentata* was chosen for genome sequencing due to its potential use as a model system  
289 for studies of the physiology of herbivory, particularly plant cell wall breakdown. PCWDEs were  
290 present in large numbers in the *M. extradentata* genome (5 cellulase gene models, 87 pectinase  
291 gene models, 3 beta-1,3-glucanase gene models, and 33 cellobiase gene models). A detailed  
292 analysis of cellulases and pectinases across six hemimetabolous insect herbivores revealed large  
293 variation in the size of the pectinase family, and less but still significant variation in the size of  
294 the cellulase gene family (Figure 1). While cellulases were present in all species analyzed, we  
295 only identified pectinases in the Phasmatidae (*M. extradentata*, *C. hookeri*, *D. australis*) and the  
296 cockroach *B. germanica*.

297 Gene family specific phylogenies showed that all identified pectinases were more closely  
298 related to bacterial than eukaryotic pectinases (Figure 1A). Nevertheless, most pectinases in the  
299 genomes of the Phasmatidae species were located near eukaryotic genes, suggesting that they  
300 were inserted in the insect genome and not due to bacterial contamination. While the pectinases  
301 in the cockroach were similarly located in large scaffolds with eukaryote gene predictions, the  
302 20kb flanking regions never contained eukaryotic genes and were more similar to bacterial than  
303 insect genomic sequences. Accordingly, we were not able to unequivocally identify if the genes

304 were located on the insect genome or part of bacterial contamination leading to genome  
305 assembly artifacts.

306 Interestingly, all phasmatida pectinases clustered as a monophyletic group within the  
307 gammaproteobacteria clade. We identified seven 1:1 orthologous pectinase genes in *C. hookeri*  
308 and *D. australis*, as well as 7 duplications or larger expansions specific to *C. hookeri*  
309 (Supplemental Figure 1). *M. extradentata* on the other hand had only 4 pectinases with simple  
310 1:1 or 1:1:1 orthology to pectinases of the other two species. Most pectinases detected in the *M.*  
311 *extradentata* genome were part of large lineage-specific gene family expansions. These results  
312 confirm that a single horizontal gene transfer from gammaproteobacteria preceding the split of  
313 the Phasmatidae is the most likely mechanism for the origin of pectinase genes in the genome of  
314 this insect lineage (Shelomi et al. 2016b), and that pectinases evolved through a birth-death  
315 mechanism common for multi-gene families (Nei and Rooney 2005) after the horizontal gene  
316 transfer event.

317 Similar to the Phasmatidae, the pectinases detected in the cockroach genome were more  
318 closely related to bacteria than eukaryotes, however, they clustered with multiple different  
319 bacterial lineages (Supplementary Figure 1). This suggests different bacterial origins of the  
320 pectinases associated with the two lineages of hemimetabolous insects. In contrast to the  
321 Phasmatidae, these findings do not support a single horizontal gene transfer event from bacteria  
322 to cockroaches, but rather indicate that the identified pectinases are indeed of bacterial origin. It  
323 is likely that the identified pectinases in the genome assembly represent assembly artifacts due to  
324 bacterial contamination. Accordingly, the origin of the pectinases identified in the cockroach  
325 genome needs to be verified in future hemiptera-specific analyses.

326 In comparison to the pectinases, the cellulase gene family was more similar between  
327 species. All cellulases clustered within insects in lineage-specific clades (Figure 1B;  
328 Supplemental Figure 2).

329

### 330 **Conclusions**

331 The large 3.3Gbp *Medauroidea extradentata* genome presented here will facilitate the further  
332 exploration of the evolution of PCW breakdown in phasmids, a complex process involving  
333 numerous gene duplications and horizontal gene transfer. The large gene family for pectinases,  
334 in particular, which varies strongly in size across the Phasmatodea and other insect orders, will  
335 be a promising candidate for future work. Further, hemimetabolous insects, and phasmids in  
336 particular, are still poorly represented in genome studies; this work therefore contributes to a  
337 more balanced representation of available genomes for evolutionary studies. Finally, this work  
338 will also facilitate studies of repetitive element evolution, as there is slowly building up a  
339 sufficiently large number of large arthropod genomes for comparative analysis in this context.

340

### 341 **Literature cited**

342

343 Altschul, SF, Gish W, Miller W, Myers EW, Lipman DJ (1990) Basic local alignment search  
344 tool. *J. Mol. Biol.* 215: 403-410

345 Bai X, Yuan XJ, Wen AY, Li JF, Bai YF, Shao T (2016) Cloning, expression and  
346 characterization of a cold-adapted endo-1, 4-beta-glucanase from *Citrobacter farmeri* A1,  
347 a symbiotic bacterium of *Reticulitermes labralis*. *Peerj* 4

348 Beguin P, Aubert JP (1994) The biological degradation of cellulose. *Fems Microbiol Rev* 13:25-  
349 58

350 Brand P, Saleh N, Pan HL, Li C, Kapheim KM, Ramirez SR (2017) The Nuclear and  
351 Mitochondrial Genomes of the Facultatively Eusocial Orchid Bee *Euglossa dilemma*. *G3-*  
352 *Genes Genom Genet* 7:2891-2898

353 Brand P, Ramirez S (2017) The Evolutionary Dynamics of the Odorant Receptor Gene Family in  
354 Corbiculate Bees. *Genome Biol Evol* 9(8):2023-2036

355 Bray NL, Pimentel H, Melsted P, Pachter L (2016) Near-optimal probabilistic RNA-seq  
356 quantification. *Nature Biotechnology* 34:525-527

357 Breznak JA, Brune A (1994) Role of microorganisms in the digestion of lignocellulose by

- 358 termites. *Annu Rev Entomol* 39:453-487
- 359 Calderon-Cortes N, Quesada M, Watanabe H, Cano-Camacho H, Oyama K (2012) Endogenous  
360 Plant Cell Wall Digestion: A Key Mechanism in Insect Evolution. *Annu Rev Ecol Evol*  
361 S: 43:45-71
- 362 Cantarel BL, Korf I, Robb SMC, Parra G, Ross E, *et al.* (2008) MAKER: An easy-to-use  
363 annotation pipeline designed for emerging model organism genomes. *Genome Res*  
364 18:188-196
- 365 Chalopin D, Naville M, Plard F, Galiana D, Volff JN (2015) Comparative Analysis of  
366 Transposable Elements Highlights Mobilome Diversity and Evolution in Vertebrates.  
367 *Genome Biol Evol* 7:567-580
- 368 Chang Z, Li G, Liu J, Zhang Y, Ashby C, Liu D, Cramer CL, Huang X. (2015) Bridger: a new  
369 framework for de novo transcriptome assembly using RNA-seq data. *Genome Biol* 16:30
- 370 Cosgrove DJ (2005) Growth of the plant cell wall. *Nat Rev Mol Cell Biol* 6:850-861
- 371 Harrison MC, Jongepier E, Robertson Hm, Arning N, Bitard-Feildel T *et al.* (2018)  
372 Hemimetabolous genomes reveal molecular basis of termite eusociality. *Nat ecol evol*  
373 374:227.
- 374 Kao DM, Lai AG, Stamatakis E, Rosic S, Konstantinides N, *et al.* (2016) The genome of the  
375 crustacean *Parhyale hawaiiensis*, a model for animal development, regeneration, immunity  
376 and lignocellulose digestion. *Elife* 5
- 377 Katoh K, Misawa K, Kuma K-I, Miyata T. 2002. MAFFT: a novel method for  
378 rapid multiple sequence alignment based on fast Fourier transform. *Nucleic Acids Res.*  
379 30:3059–3066.
- 380 Keegstra K (2010) Plant Cell Walls. *Plant Physiol* 154:483-486
- 381 Kidwell MG (2002) Transposable elements and the evolution of genome size in eukaryotes.  
382 *Genetica* 115:49-63
- 383 Kirsch R, Gramzow L, Theissen G, Siegfried BD, Ffrench-Constant RH, *et al* (2014) Horizontal  
384 gene transfer and functional diversification of plant cell wall degrading  
385 polygalacturonases: Key events in the evolution of herbivory in beetles. *Insect Biochem*  
386 *Molec* 52:33-50
- 387 Leese F, Brand P, Rozenberg A, Mayer C, Agrawal S, *et al* (2012) Exploring Pandora’s box:  
388 potential and pitfalls of low coverage genome surveys for evolutionary biology. *Plos One*  
389 7: e49202
- 390 Lo N, Watanabe H, Sugimura M (2003) Evidence for the presence of a cellulase gene in the last  
391 common ancestor of bilaterian animals. *P Roy Soc B-Biol Sci* 270:S69-S72
- 392 Martin MM (1991) The evolution of cellulose digestion in insects. *Philos T R Soc B* 333:281-  
393 288
- 394 Mayer C (2010) Phobos Version 3.3.12. A tandem repeat search program. 20 pp.
- 395 Mikheyev AS, Zwick A, Magrath MJL, Grau ML, Qiu L, *et al.* (2017) Museum Genomics  
396 Confirms that the Lord Howe Island Stick Insect Survived Extinction. *Current Biology*  
397 27(20):3157–3161.e4.
- 398 Nakashima K, Watanabe H, Saitoh H, Tokuda G, Azuma JI (2002) Dual cellulose-digesting  
399 system of the wood-feeding termite, *Coptotermes formosanus* Shiraki. *Insect Biochem*  
400 *Mol* 32:777-784
- 401 Nei M, Rooney AP (2005) Concerted and birth-and-death evolution of multigene families. *Annu*  
402 *Rev Genet* 39(1):121–152.
- 403 Pauly M, Keegstra K (2010) Plant cell wall polymers as precursors for biofuels. *Curr Opin Plant*



- 404 Biol 13:305-312
- 405 Platt RN, Mangum SF, Ray DA (2016) Pinpointing the vesper bat transposon revolution using  
406 the *Miniopterus natalensis* genome. *Mobile DNA* 7
- 407 Prysycz LP, Gabaldon T (2016) Redundans: an assembly pipeline for highly heterozygous  
408 genomes. *Nucleic Acids Res* 44
- 409 Riesch R, Muschick M, Lindtke D, Villoutreix R, Comeault AA, *et al.* (2017) Transitions  
410 between phases of genomic differentiation during stick-insect speciation. *Nat ecol evol.*  
411 1(4):0082.
- 412 Sanggaard KW, Bechsgaard JS, Fang X, Duan J, Dyrland TF, *et al.* (2014) Spider genomes  
413 provide insight into composition and evolution of venom and silk. *Nat Comm* 5:3765
- 414 Shelomi M, Heckel DG, Pauchet Y (2016) Ancestral gene duplication enabled the evolution of  
415 multifunctional cellulases in stick insects (Phasmatodea). *Insect Biochem Mol* 71:1-11
- 416 Shelomi M, Jasper WC, Atallah J, Kimsey LS, Johnson BR (2014a) Differential expression of  
417 endogenous plant cell wall degrading enzyme genes in the stick insect (Phasmatodea)  
418 midgut. *Bmc Genomics* 15
- 419 Shelomi M, Watanabe H, Arakawa G (2014b) Endogenous cellulase enzymes in the stick insect  
420 (Phasmatodea) gut. *J Insect Physiol* 60:25-30
- 421 Simao FA, Waterhouse RM, Ioannidis P, Kriventseva EV, Zdobnov EM (2015) BUSCO:  
422 assessing genome assembly and annotation completeness with single-copy orthologs.  
423 *Bioinformatics* 31:3210-3212
- 424 Slater GSC, Birney E (2005) Automated generation of heuristics for biological sequence  
425 comparison. *BMC Bioinformatics* 6(1):31.
- 426 Slaytor M (1992) Cellulose digestion in termites and cockroaches: what role do symbionts play.  
427 *Comp Biochem B* 103:775-784
- 428 Smit A, Hubley R (2015) RepeatModeler Open-1.0: <http://repeatmasker.org>
- 429 Soria-Carrasco V, Gompert Z, Comeault AA, Farkas TE, Parchman TL, *et al.* (2014) Stick Insect  
430 Genomes Reveal Natural Selection's Role in Parallel Speciation. *Science* 344:738-742
- 431 Stamatakis A, Ludwig T, Meier H. 2005. RAxML-III: a fast program for maximum likelihood-  
432 based inference of large phylogenetic trees. *Bioinformatics* 21(4):456-463.
- 433 Stanke M, Steinkamp R, Waack S, Morgenstern B (2004) AUGUSTUS: a web server for gene  
434 finding in eukaryotes. *Nucleic Acids Res* 32:W309-W312
- 435 Terrapon N, *et al.* (2014) Molecular traces of alternative social organization in a termite genome.  
436 *Nature Communications* 5:3636.
- 437 Wang XH, Fang XD, Yang PC, Jiang XT, Jiang F, *et al.* (2014) The locust genome provides  
438 insight into swarm formation and long-distance flight. *Nat Commun* 5:1-9
- 439 Watanabe H, Noda H, Tokuda G, Lo N (1998) A cellulase gene of termite origin. *Nature*  
440 394:330-331
- 441 Watanabe H, Tokuda G (2010) Cellulolytic Systems in Insects. *Annu Rev Entomol* 55:609-632
- 442 Weisenfeld NI, Yin SY, Sharpe T, Lau B, Hegarty R, Holmes L, Sogoloff B, Tabbaa D,  
443 Williams L, Russ C, Nusbaum C, Lander ES, MacCallum L, Jaffe DB (2014)  
444 Comprehensive variation discovery in single human genomes. *Nat Genet* 46:1350-1355
- 445 Wu C, Crowhurst RN, Dennis AB, Twort VG, Liu SL, Newcomb RD, Ross HA, Buckley TR  
446 (2016) De Novo Transcriptome Analysis of the Common New Zealand Stick Insect  
447 *Clitarchus hookeri* (Phasmatodea) Reveals Genes Involved in Olfaction, Digestion and  
448 Sexual Reproduction. *Plos One* 11
- 449 Wu C, Twort VG, Crowhurst RN, Newcomb RD, Buckley TR (2017) Assembling large

450 genomes: analysis of the stick insect (*Clitarchus hookeri*) genome reveals a high repeat  
451 content and sex-biased genes associated with reproduction. *Bmc Genomics* 18  
452 Zhang SV, Zhuo LT, Hahn MW (2016) AGOUTI: improving genome assembly and annotation  
453 using transcriptome data. *Gigascience* 5  
454

## 455 **Table and Figure Legends**

456

457 **Table 1.** Basic assembly statistics for several recently sequenced large genome arthropods  
458 (Wang et al 2014; Soria-Carrasco et al 2014; Sanggaard et al 2014; Kao et al 2016; Harrison et al  
459 2017; Wu et al 2017; McGrath et al 2017).

460

461 **Table 2.** Busco analysis comparison for other large genome size arthropods. Complete refers to  
462 genes within a core list of one to one orthologs across the arthropods (arthopoda\_db) that are  
463 complete in the present assembly. Fragmented and missing likewise refer to highly conserved  
464 genes from arthropoda\_db that are either present, but incomplete (fragments), or missing from the  
465 present assembly.

466

467 **Table 3.** Results of transposable element repeat class analysis.

468

469 **Figure 1.** Cell wall degrading enzyme gene family dynamics. **A)** The pectinase genes identified  
470 in the three Phasmatodea species all clustered within the gammaproteobacteria, while the  
471 pectinases identified in the *B. germanica* genome (Bger) were located throughout the bacteria.  
472 Numbers in brackets indicate the number of *B. germanica* genes in collapsed clades. **B)** All  
473 cellulase genes identified clustered in a single insect clade. **C)** Table including pectinase and  
474 cellulase genes identified in the six hemimetabolous species. Numbers in brackets represent the  
475 number of pseudogenes. Bootstrap support  $\geq 90$  are marked on respective branches.

476

477 **Supplemental Figure 1 Phylogenetic tree of the pectinase gene family.** All phasmatodea  
478 pectinases cluster within the gammaproteobacteria and form a highly supported monophyletic  
479 clade, supporting a single horizontal gene transfer event in the ancestor of the three insect  
480 lineages analyzed. Pectinases detected in the *B. germanica* genome cluster within bacteria as  
481 well, but do not form a monophyletic clade. It is likely that the pectinases identified are due to  
482 bacterial contamination of the genome assembly (see main text). Known chrysomelid beetle  
483 pectinases cluster within fungi, representing independent horizontal gene transfer events of  
484 pectinases from fungi to insects (Pauchet et al. 2010) Orange: *M. extradentata*, Blue: *C. hookeri*,  
485 Purple: *D. australis*, Red: *B. germanica*. Bootstrap support of 100 replicates is indicated for each  
486 branch. Gene models of the four newly annotated species with insect or bacterial genes in the  
487 20kb flanking regions are indicated.

488

489 **Supplemental Figure 2 Phylogenetic tree of the cellulase gene family.** All identified cellulase  
490 genes cluster within other known bacterial cellulase genes. Orange: *M. extradentata*, Blue: *C.*  
491 *hookeri*, Purple: *D. australis*, Red: *B. germanica*, Brown: *Z. nevadensis*, Pink: *T. cristinae*.  
492 Bootstrap support of 100 replicates is indicated for each branch.

493

494

495 Table 1

| <b>Species</b>                  | <b>scaffold count</b> | <b>contig N50 (kb)</b> | <b>scaffold N50 (kb)</b> | <b>GC%</b> | <b>Genome size (Gbp)</b> |
|---------------------------------|-----------------------|------------------------|--------------------------|------------|--------------------------|
| <i>Locusta migratoria</i>       | 1,397,492             | 9.6                    | 320.3                    | 40.7       | 5.8                      |
| <i>Clitarchus hookeri</i>       | 785,781               | 3.7                    | 255.7                    | n/a        | 4.4                      |
| <i>Parhyale hawaiiensis</i>     | 976,695               | n/a                    | 81.2                     | 29.6       | 3.6                      |
| <i>Dryococelus australis</i>    | 357,088               | 17.3                   | n/a                      | 38.6       | 3.4                      |
| <i>Medauroidea extradentata</i> | 135,692               | 26.9                   | 43.0                     | 37.0       | 3.3                      |
| <i>Stegodyphus mimosarum</i>    | 68,653                | 40.1                   | 480.6                    | 33.6       | 2.7                      |
| <i>Blatella germanica</i>       | 24,792                | 12.1                   | 1056.0                   | 34.5       | 2.0                      |
| <i>Timema cristinae</i>         | 14,136                | 7.40                   | 312.7                    | 28.5       | 1.0                      |

496

497

498 Table 2

| <b>Species</b>                  | <b>Complete</b> | <b>Fragmented</b> | <b>Missing</b> |
|---------------------------------|-----------------|-------------------|----------------|
| <i>Locusta migratoria</i>       | 41.4            | 31.5              | 27.1           |
| <i>Parhyale hawaiiensis</i>     | 78.5            | 10.4              | 11.1           |
| <i>Medauroidea extradentata</i> | 78.8            | 17.4              | 3.8            |
| <i>Stegodyphus mimosarum</i>    | 92.1            | 2.7               | 5.2            |
| <i>Blatella germanica</i>       | 98.8            | 0.7               | 0.5            |

499

500

501 Table 3

| <b>Repeat Element Family</b>        | <b>Number Unique Elements</b> | <b>Total Number Elements in Assembly</b> | <b>Cumulative Length (bp)</b> | <b>Percent of Genome Assembly<sup>a</sup></b> |
|-------------------------------------|-------------------------------|------------------------------------------|-------------------------------|-----------------------------------------------|
| <b>Class I - retrotransposons</b>   | 141                           | 547,153                                  | 180,544,125                   | 6.98                                          |
| <b>Class II - DNA transposons</b>   | 171                           | 354,700                                  | 124,099,554                   | 4.80                                          |
| <b>Total classified transposons</b> | 312                           | 901,853                                  | 304,643,679                   | 11.79                                         |
| <b>Unclassified</b>                 | 1,097                         | 3,323,694                                | 969,506,662                   | 37.51                                         |
| <b>Total repeat families</b>        | 1,409                         | 4,225,547                                | 1,274,150,341                 | 49.29                                         |

502

503

504

505

506

507

508

509

510

511

512  
513  
514  
515  
516  
517  
518  
519  
520  
521  
522  
523  
524

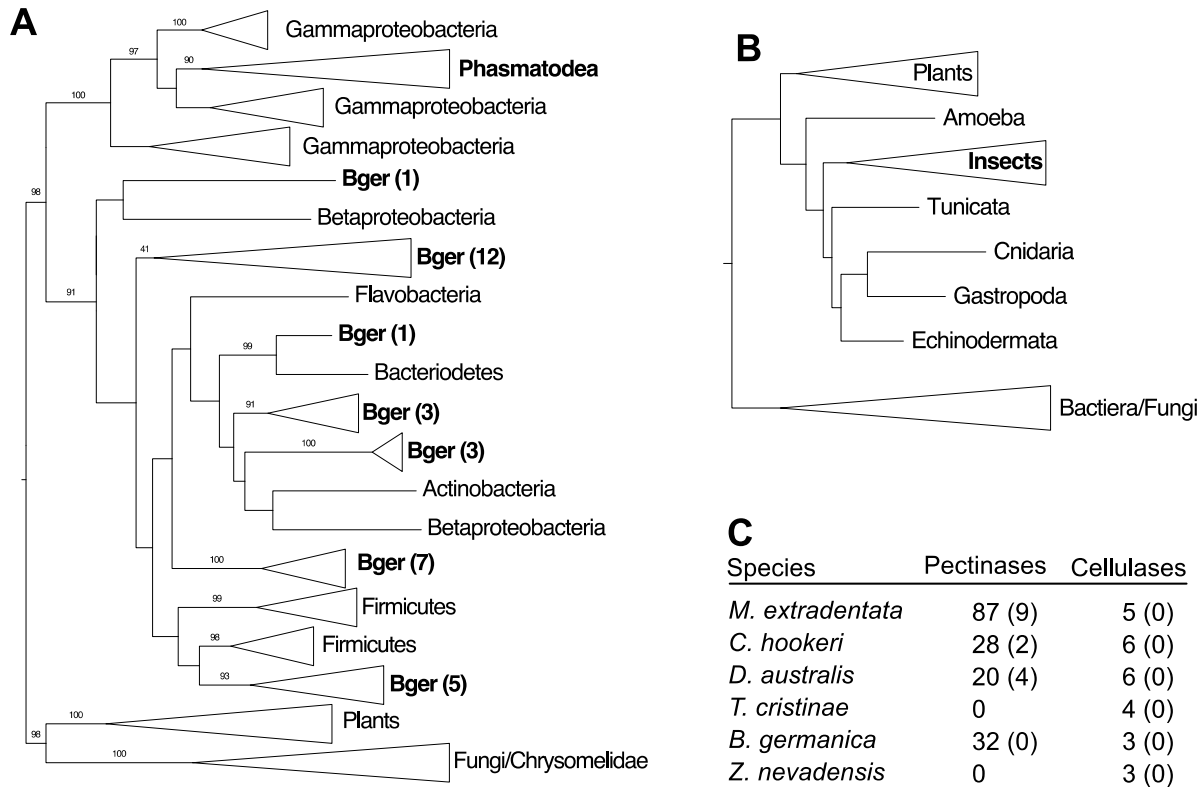

525  
526  
527  
528  
529

Figure 1
